# Supplementary material for: Anassessment of GIA solutions based on high-precision GNSS velocity field for Antarctica
Source: Copernicus journal article supplement (doi:10.5194/se-2019-101), 2019-07-09
Supplement: Supplementary file 1 [file supplement file_S1.xlsx]

## Sheet: Sheet1
	BACK	-102.48	-74.43
ASE	BERP	-111.88	-74.55
	DAVE	77.973	-68.577
	LPLY	-90.3	-73.11
	INMN	-98.8805	-74.8209
	THU4	-97.56	-72.53
	TOMO	-114.39	-75.48
	BRIP	158.47	-75.8
	BURI	155.89	-79.15
	DEVI	161.98	-81.48
	FALL	-143.63	-85.31
	FIE0	168.42	-76.14
	FTP4	162.56	-78.93
Ross	HOOZ	166.93	-77.53
	IGGY	156.25	-83.31
	LWN0	152.73	-81.35
	MACG	167.25	-77.53
	MCM4	166.87	-77.84
	MCMC	166.67	-77.84
	MIN0	167.16	-78.65
	PATN	-155.02	-78.03
	RAMG	178.05	-84.34
	SCTB	166.76	-77.85
	WHN0	154.22	-79.846
	BUMS	174.499	-85.961
	ABBZ	166.91	-77.457
	COTE	162	-77.81
	CRAR	166.67	-77.84
	DAV1	77.97	-68.58
	FLM5	160.27	-77.53
	PHIG	167.05	-77.525
	ROB4	163.19	-77.03
	MBIO	-56.623	-64.24
	PRPT	-65.339	-66.007
NAP	SPGT	-61.0537	-64.295
	CAPF	-60.56	-66.01
	DUPT	-62.82	-64.8
	FONP	-61.65	-65.25
	HUGO	-65.67	-64.96
	OHI2	-57.9	-63.62
	OHI3	-57.9	-63.62
	PAL2	-64.05	-64.78
	PALM	-64.05	-64.78
	PALV	-64.05	-64.78
	ROBN	-59.44	-65.25
	ROTH	-68.13	-67.57
	VNAD	-64.25	-65.25
	GMEZ	-68.536	-73.885
	JNSN	-66.102	-73.076
SAP	LNTK	-73.903	-74.835
	MKIB	-65.603	-75.276
	SUGG	-72.18	-75.28
	TRVE	-67.555	-69.989
	WLCH	-63.82	-70.729
	FOS1	-68.321	-71.313
	WWAY	-28.4027	-81.577
FRIS	CRDI	-53.2	-82.86
	HAAG	-78.29	-77.04
	HOWN	-86.77	-77.53
	WILN	-80.56	-80.04
	CAS1	110.52	-66.28
	DUM1	140	-66.67
	MAW1	62.87	-67.6
EA	SYOG	39.58	-69.01
	VESL	-2.84	-71.67
	VL01	169.725	-72.45
	VL12	163.727	-72.274
	VL30	162.525	-70.599
	BENN	-116.46	-84.79
	CLRK	-141.87	-77.34
	HOWE	-149.43	-87.42
	MCAR	-144.304	-76.322
WA	PECE	-68.56	-85.61
	SDLY	-125.97	-77.14
	WHTM	-104.39	-82.68
	PIRT	-85.1426	-81.1032
	RMBO	-66.3938	-83.8732
	STEW	-86.2473	-84.187
	WLCT	-87.3925	-85.3692
